# Supplementary material
Source: PubMed Central journal article supplement (PMC7534693)
Supplement: NIHMS1623647-supplement-3.pdf [file NIHMS1623647-supplement-3.pdf]

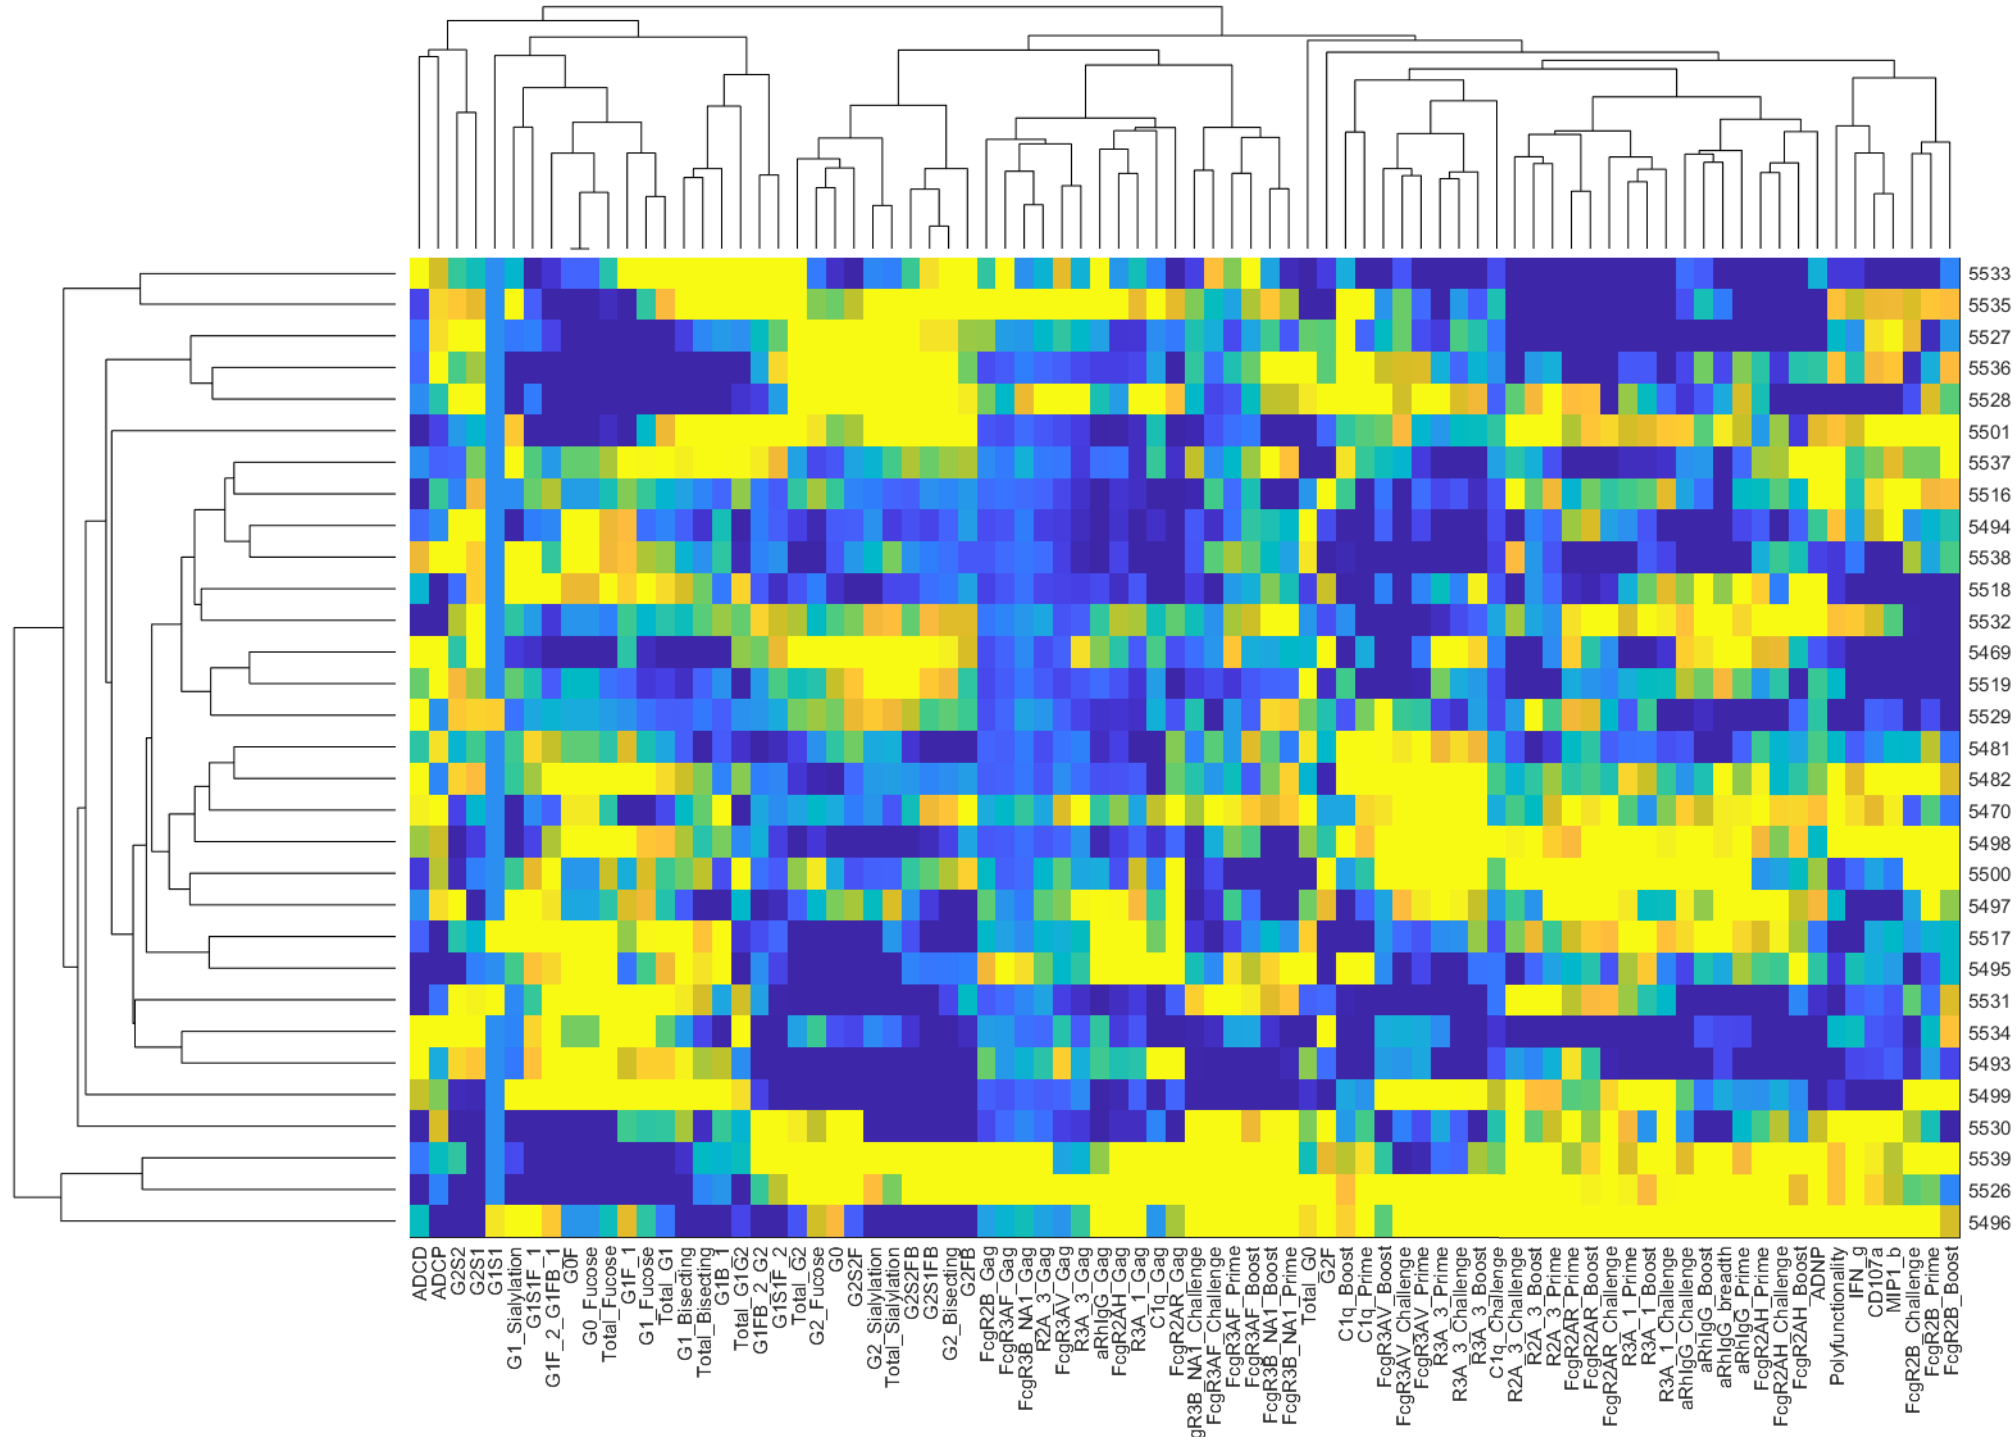

**Animal**

**IgG Attribute**

- ADCD
- ADCP
- G2S2
- G2S1
- G1S1
- G1\_Sialylation
- G1S1F\_1
- G1F\_2\_G1FB\_1
- G0F
- G0\_Fucose
- Total\_Fucose
- G1\_Fucose
- Total\_G1
- G1\_Bisecting
- Total\_Bisecting
- G1B\_1
- Total\_G1G2
- G1FB\_2\_G2
- G1S1F\_2
- Total\_G2
- G2\_Fucose
- G0
- G2S2F
- G2\_Sialylation
- Total\_G2S2FB
- G2S1FB
- G2\_Bisecting
- G2FB
- FcgR2B\_Gag
- FcgR3AF\_Gag
- FcgR3B\_NA1\_Gag
- R2A\_3\_Gag
- FcgR3AV\_Gag
- R3A\_3\_Gag
- aRhlgG\_Gag
- FcgR2AH\_Gag
- R3A\_1\_Gag
- C1q\_Gag
- FcgR2AR\_Gag
- gR3B\_NA1\_Challenge
- FcgR3AF\_Challenge
- FcgR3AF\_Prime
- FcgR3AF\_Boost
- FcgR3B\_NA1\_Boost
- FcgR3B\_NA1\_Prime
- Total\_G0
- G2F
- C1q\_Boost
- C1q\_Prime
- FcgR3AV\_Boost
- FcgR3AV\_Challenge
- FcgR3AV\_Prime
- R3A\_3\_Prime
- R3A\_3\_Challenge
- R3A\_3\_Boost
- C1q\_Challenge
- R2A\_3\_Boost
- R2A\_3\_Prime
- FcgR2AR\_Prime
- FcgR2AR\_Boost
- FcgR2AR\_Challenge
- R3A\_1\_Boost
- R3A\_1\_Challenge
- aRhlgG\_Challenge
- aRhlgG\_Boost
- aRhlgG\_breadth
- aRhlgG\_Prime
- FcgR2AH\_Prime
- FcgR2AH\_Challenge
- FcgR2AH\_Boost
- ADNP
- Polyfunctionality
- IFN\_0
- CD107a
- MIP1\_b
- FcgR2B\_Challenge
- FcgR2B\_Prime
- FcgR2B\_Boost

- 5533
- 5535
- 5527
- 5536
- 5528
- 5501
- 5537
- 5516
- 5494
- 5538
- 5518
- 5532
- 5469
- 5519
- 5529
- 5481
- 5482
- 5470
- 5498
- 5500
- 5497
- 5517
- 5495
- 5531
- 5534
- 5493
- 5499
- 5530
- 5539
- 5526
- 5496
