# Supplementary material
Source: PubMed Central journal article supplement (PMC7534693)
Supplement: NIHMS1623647-supplement-6.pdf [file NIHMS1623647-supplement-6.pdf]

## d1 post boost

**A**

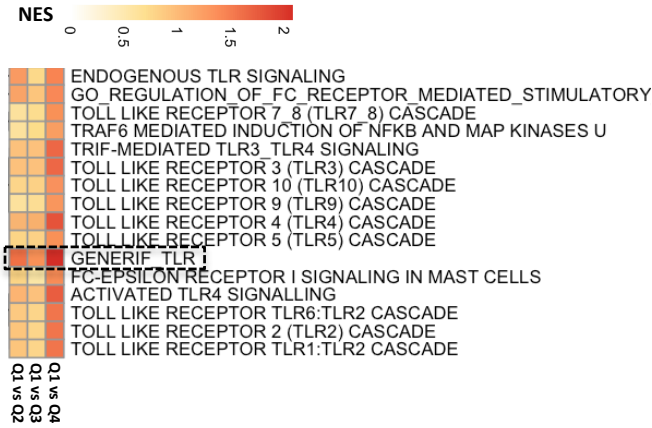

**B**

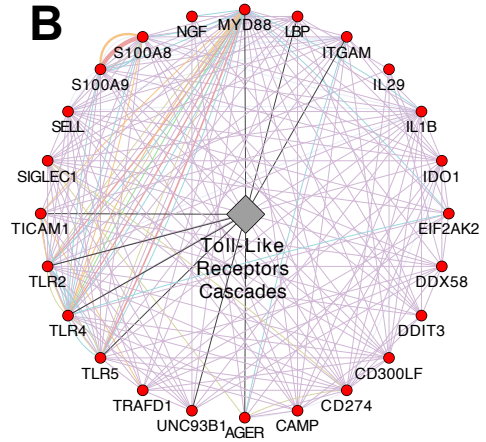

**C**

## d7 post boost

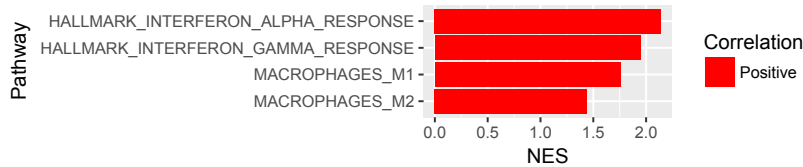

| Pathway                            | NES  | Correlation | NOM_pval | FDR_qval |
|------------------------------------|------|-------------|----------|----------|
| HALLMARK_INTERFERON_ALPHA_RESPONSE | 2.14 | Positive    | 0        | 0        |
| HALLMARK_INTERFERON_GAMMA_RESPONSE | 1.95 | Positive    | 0        | 0        |
| MACROPHAGES_M1                     | 1.76 | Positive    | 0.00175  | 0.00638  |
| MACROPHAGES_M2                     | 1.44 | Positive    | 0.0339   | 0.21     |

0=<0.0001

**D**

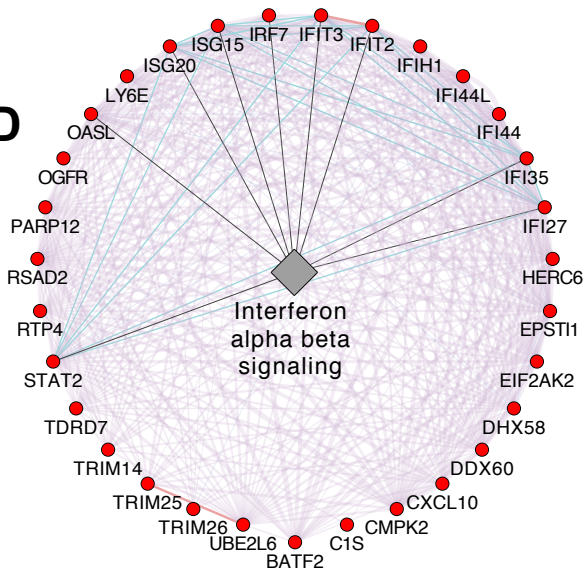

**E**

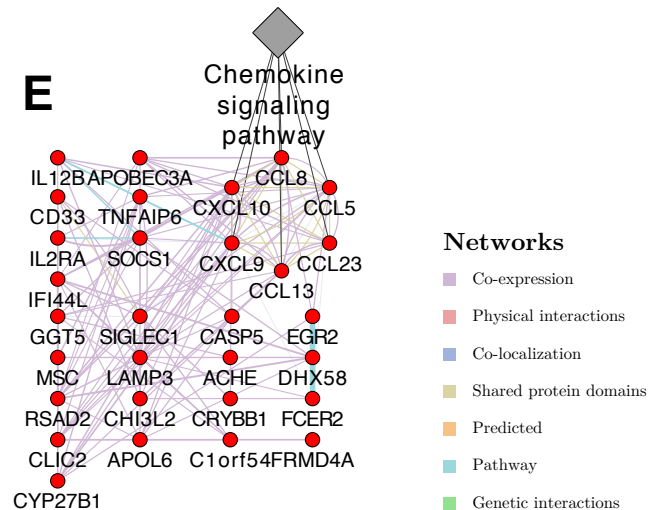

### Networks

- Co-expression
- Physical interactions
- Co-localization
- Shared protein domains
- Predicted
- Pathway
- Genetic interactions
