# Supplementary material
Source: PubMed Central journal article supplement (PMC7534693)
Supplement: NIHMS1623647-supplement-7.pdf [file NIHMS1623647-supplement-7.pdf]

**A**

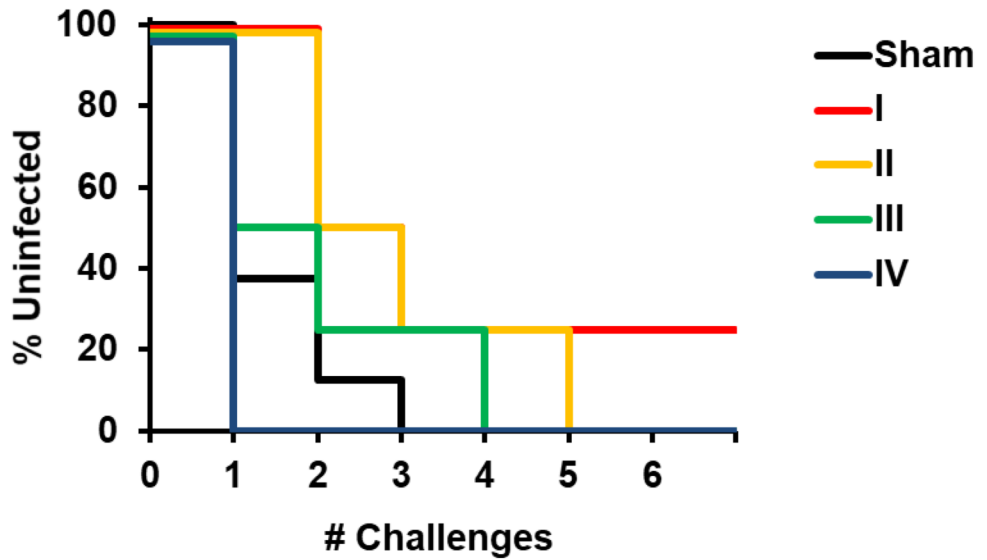

**B**

| Comparison          | Log-Rank Test | Cox PH Model         |         | Weibull Survival Model |         |
|---------------------|---------------|----------------------|---------|------------------------|---------|
|                     | p-value       | HR (95% CI)          | p-value | HR (95% CI)            | p-value |
| I vs. Sham          | 0.055         | 0.108 (0.015, 0.770) | 0.026   | 0.138 (0.033, 0.579)   | 0.007   |
| II vs. Sham         | 0.055         | 0.154 (0.023, 1.031) | 0.054   | 0.184 (0.049, 0.688)   | 0.012   |
| III vs. Sham        | 0.3679        | 0.399 (0.059, 2.701) | 0.346   | 0.320 (0.088, 1.161)   | 0.083   |
| IV vs. Sham         | 0.1757        | N/A                  |         | 3.063 (0.836, 11.220)  | 0.091   |
| Trend (I>II>III>IV) | N/A           | 0.322 (0.132, 0.785) | 0.013   | 0.443 (0.238, 0.821)   | 0.010   |
