# Supplementary material
Source: PubMed Central journal article supplement (PMC7534693)

# SIV Study

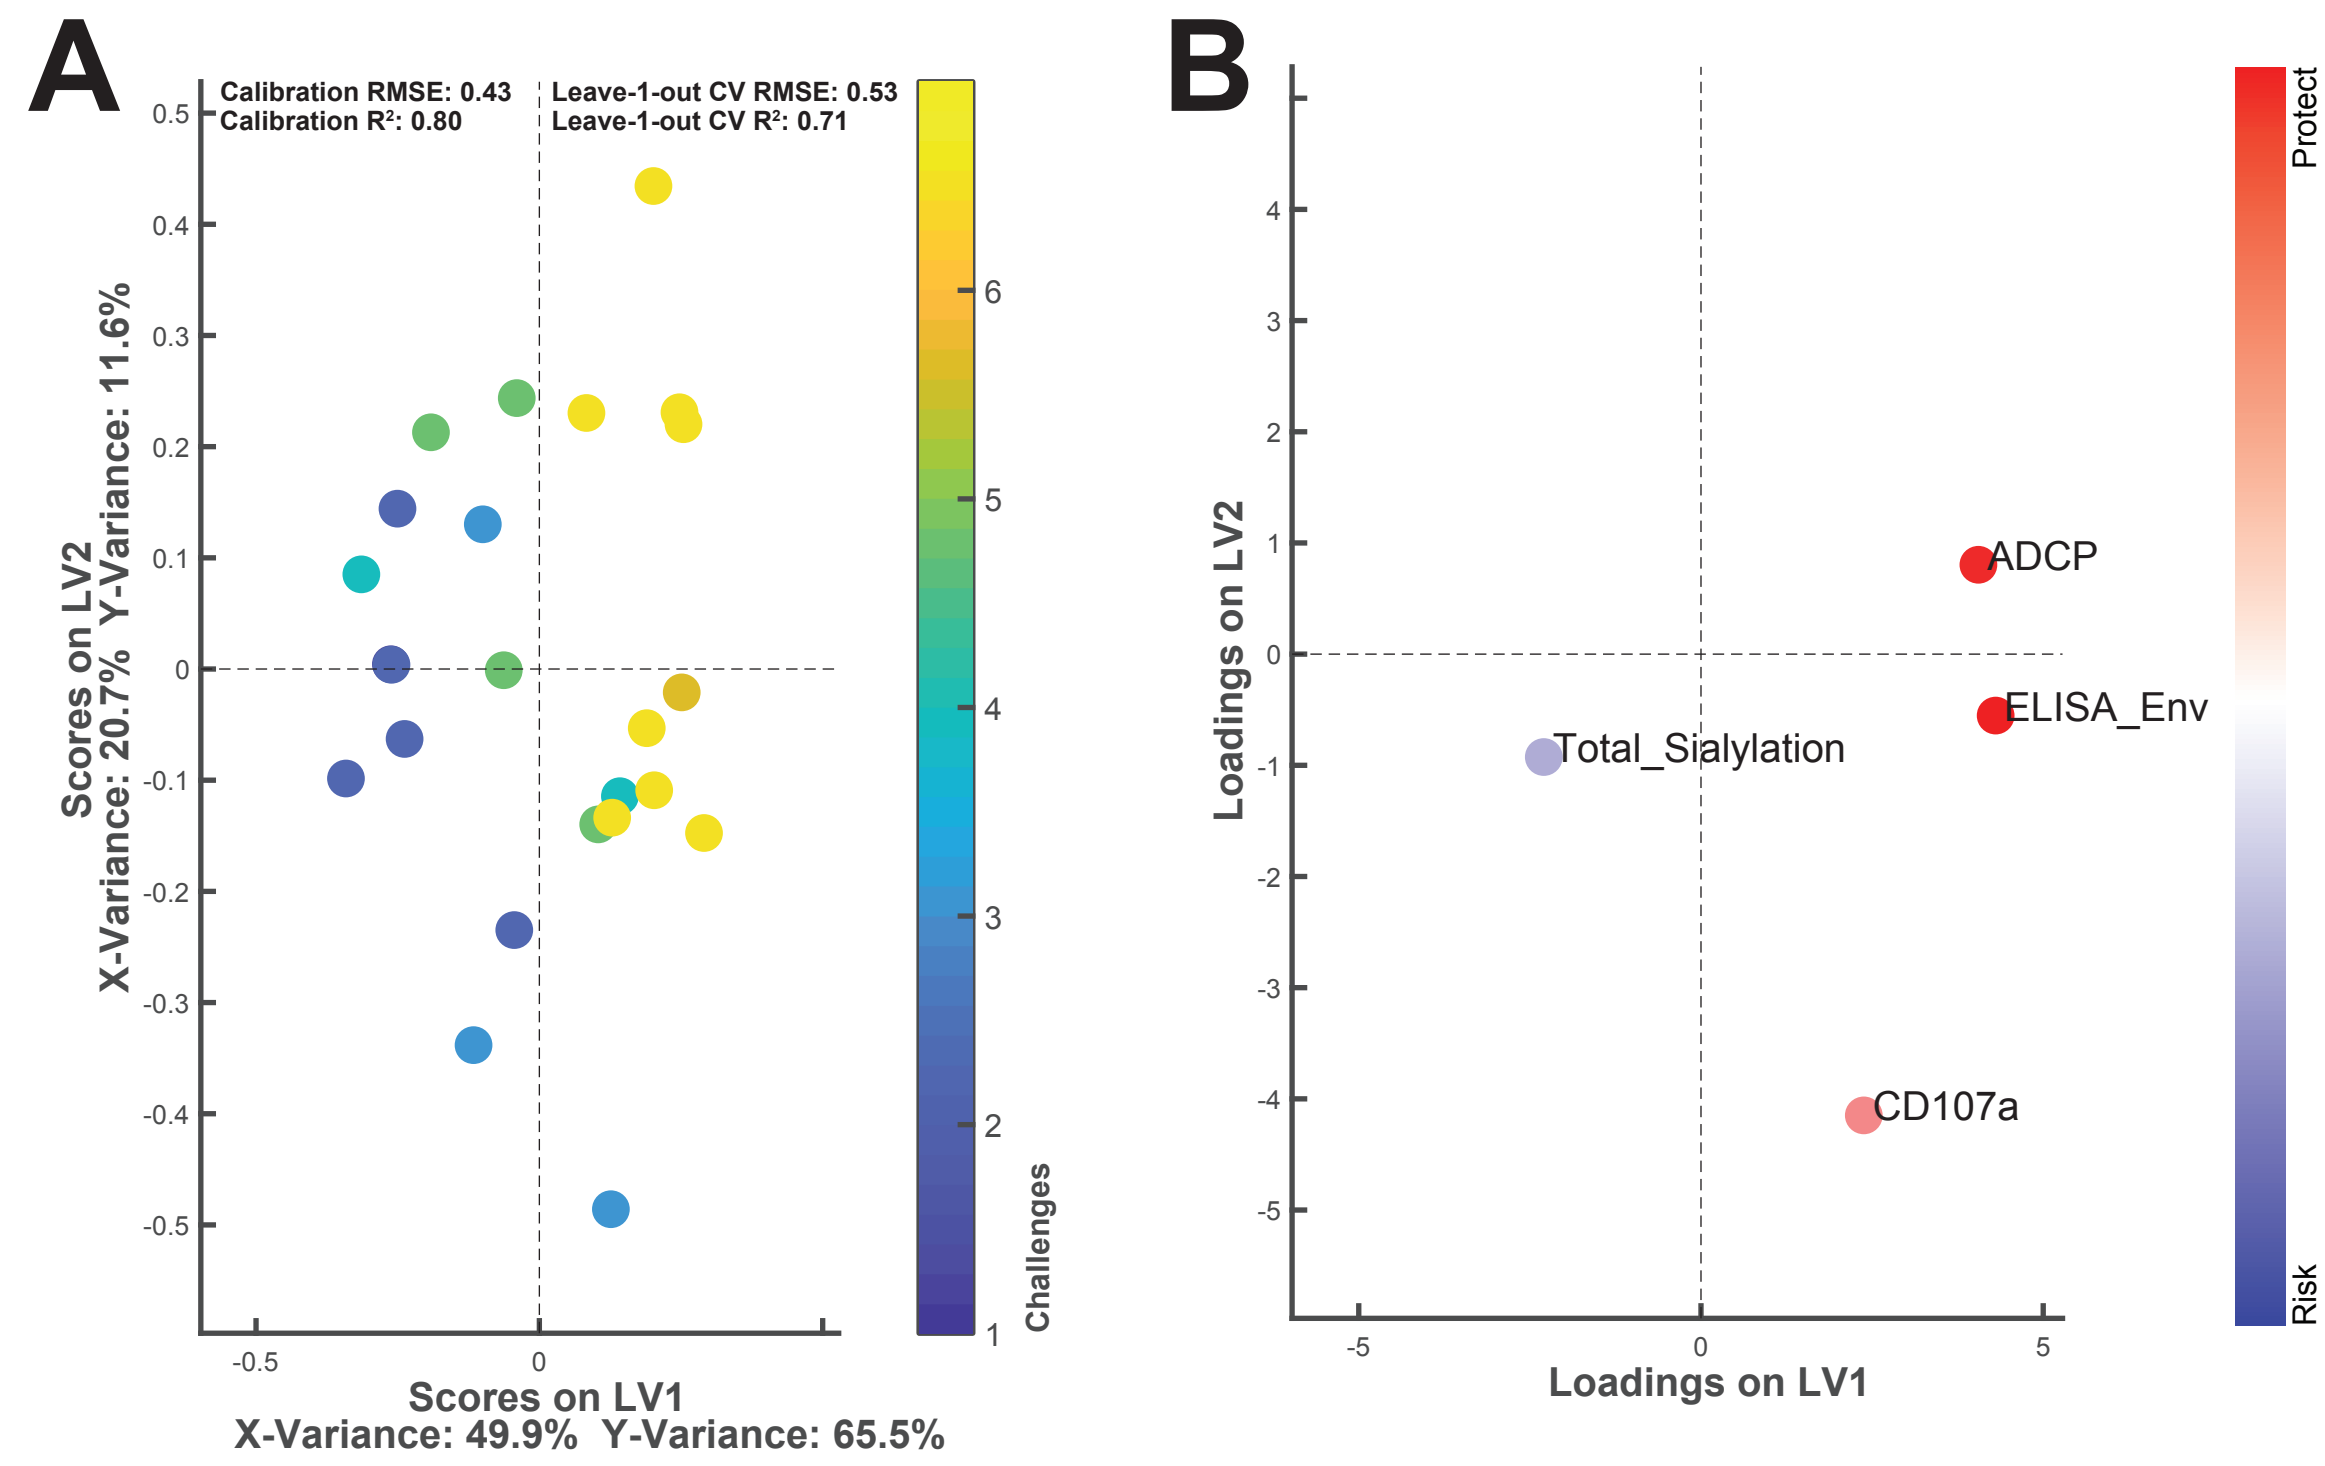

# SHIV Study

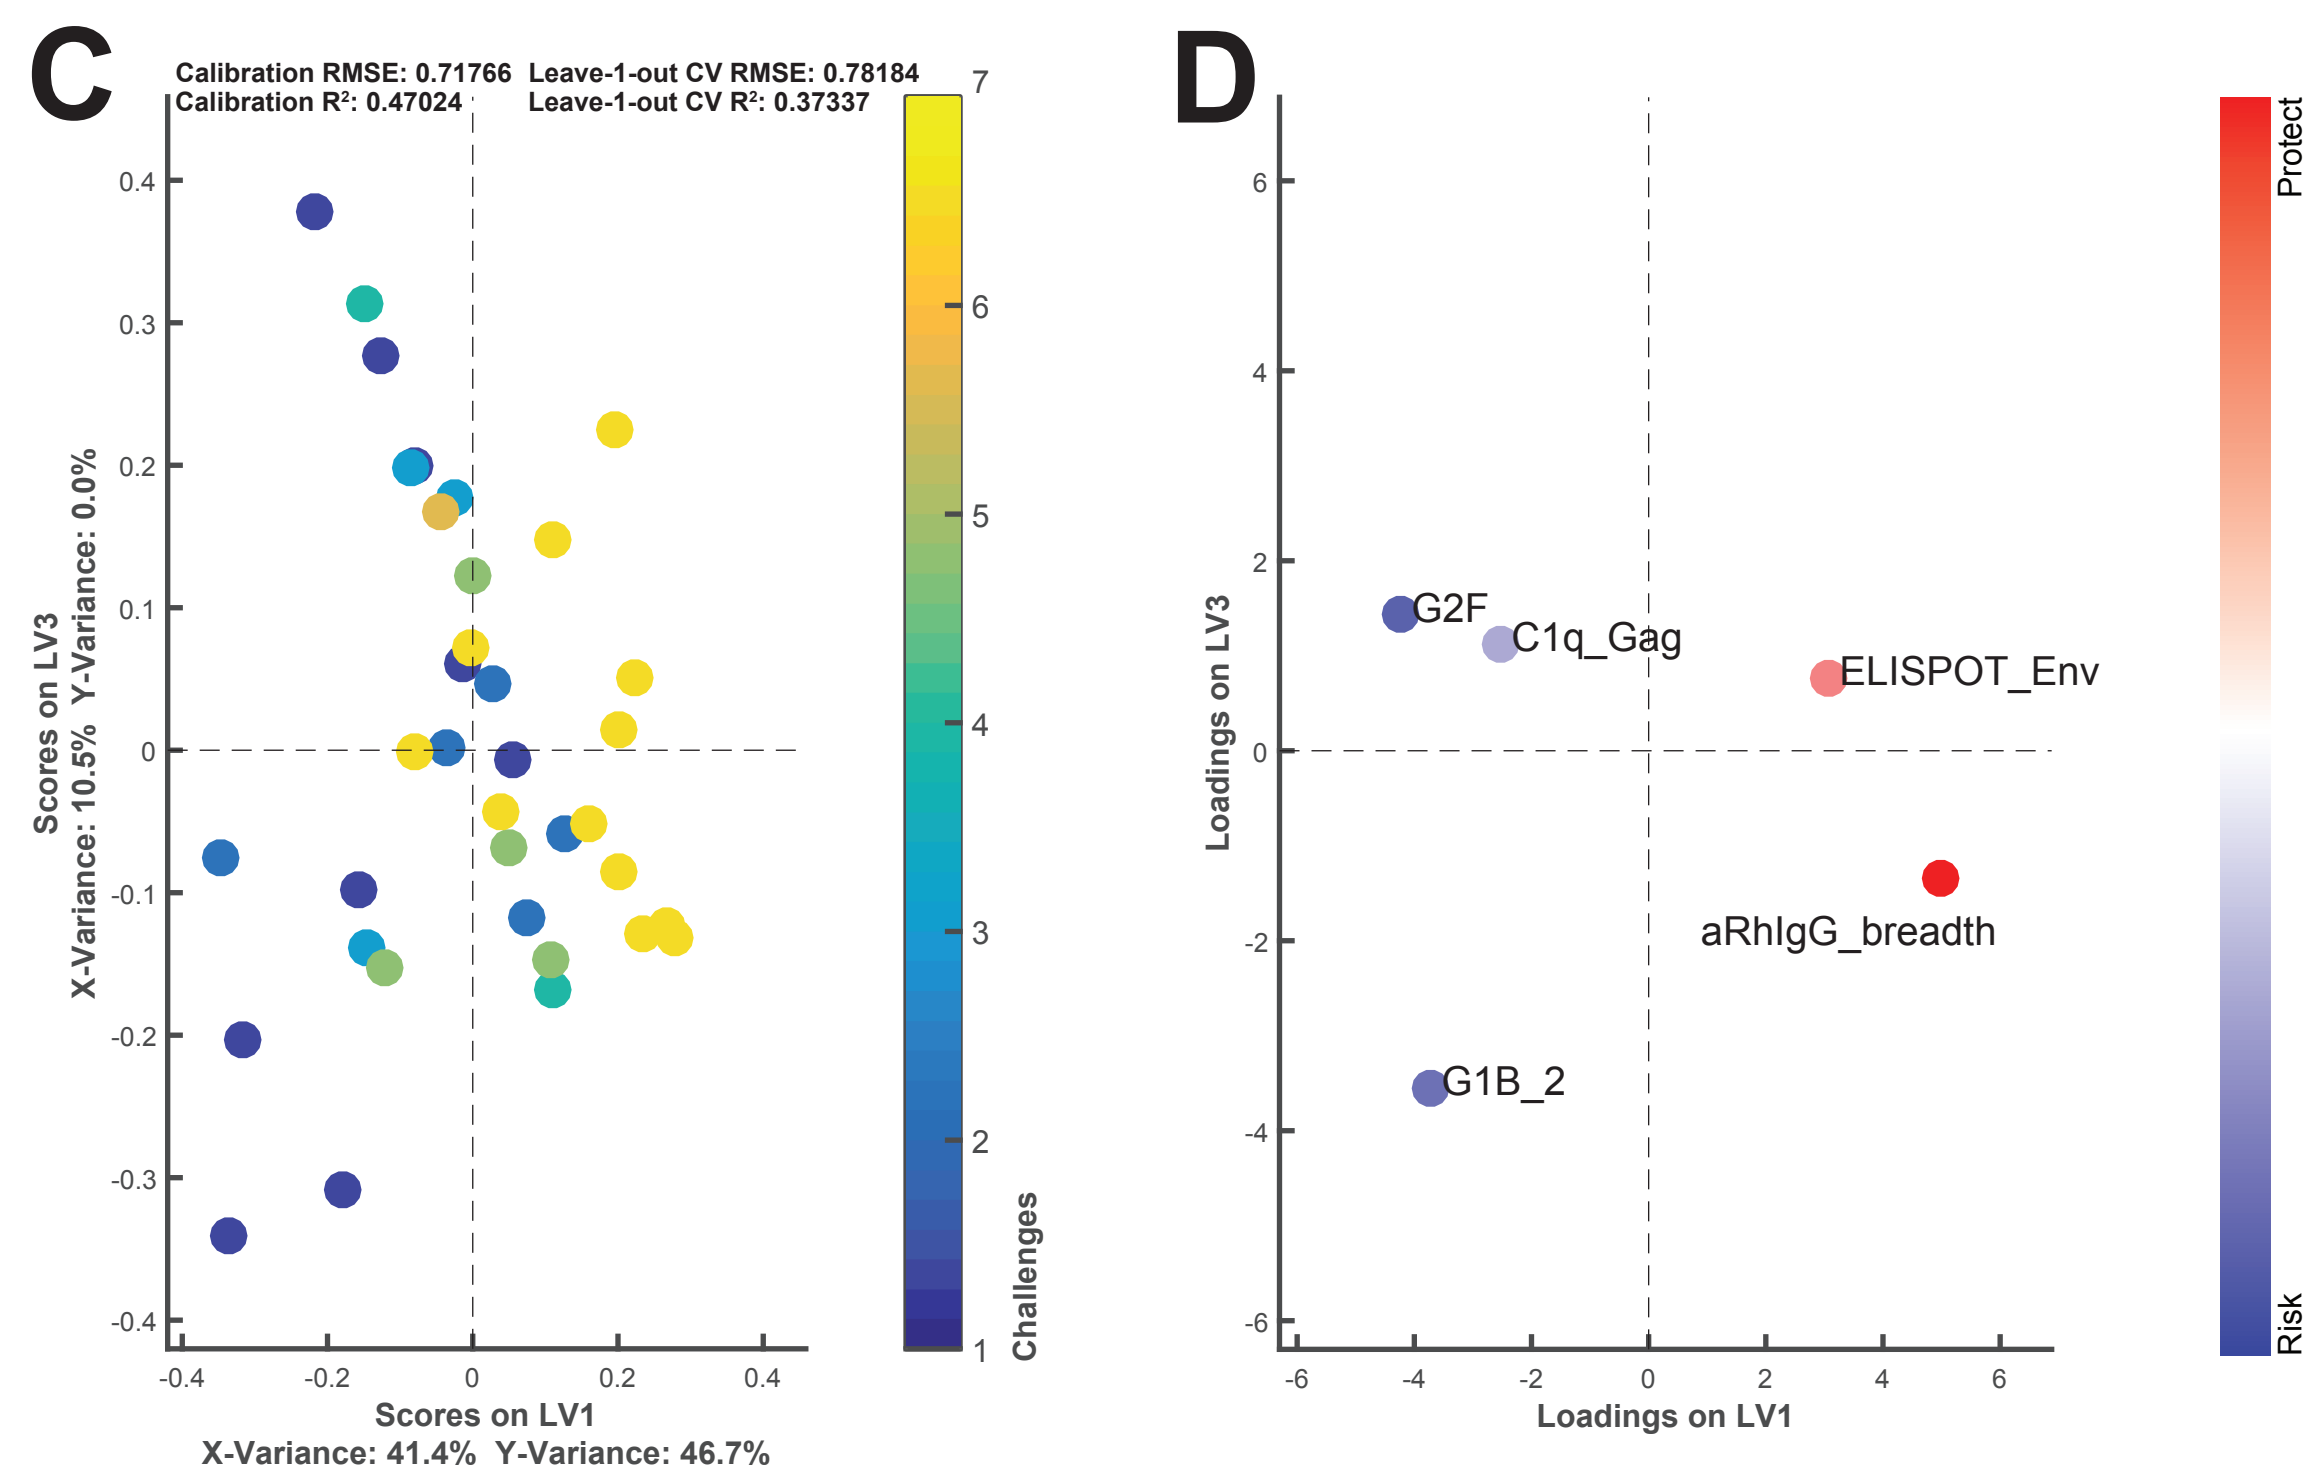

Supplement: NIHMS1623647-supplement-2.pdf [file NIHMS1623647-supplement-2.pdf]

**A**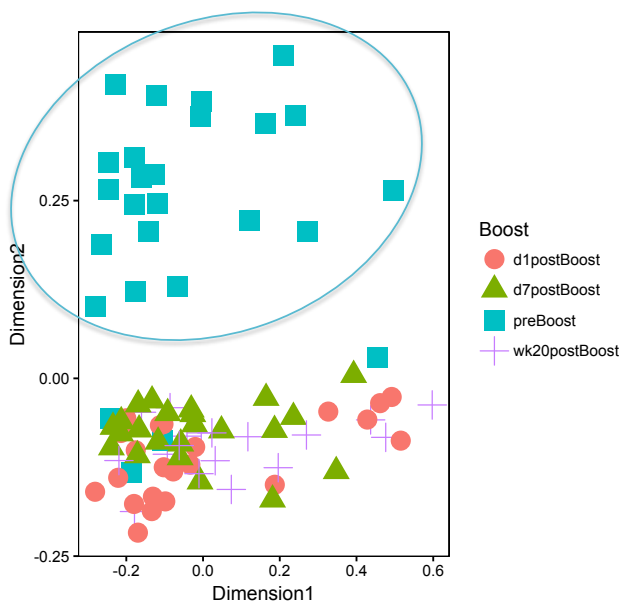**B**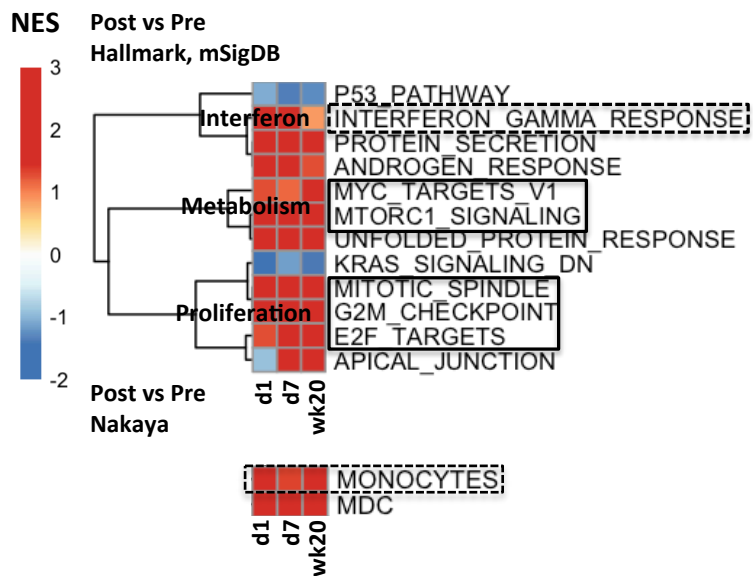**C**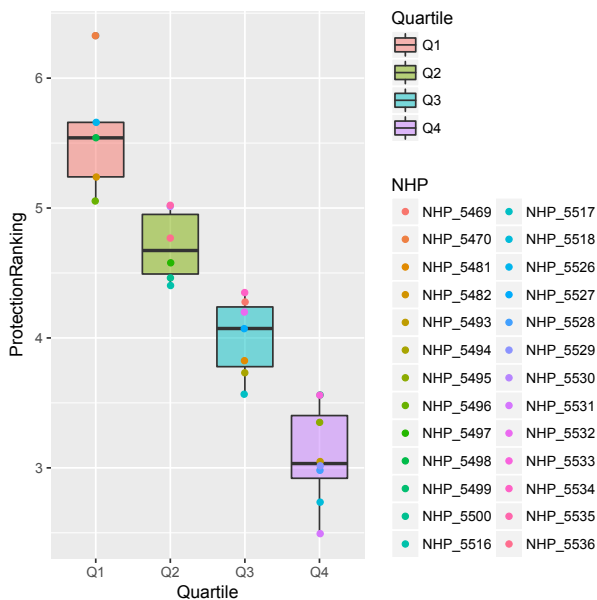

Supplement: NIHMS1623647-supplement-4.pdf [file NIHMS1623647-supplement-4.pdf]

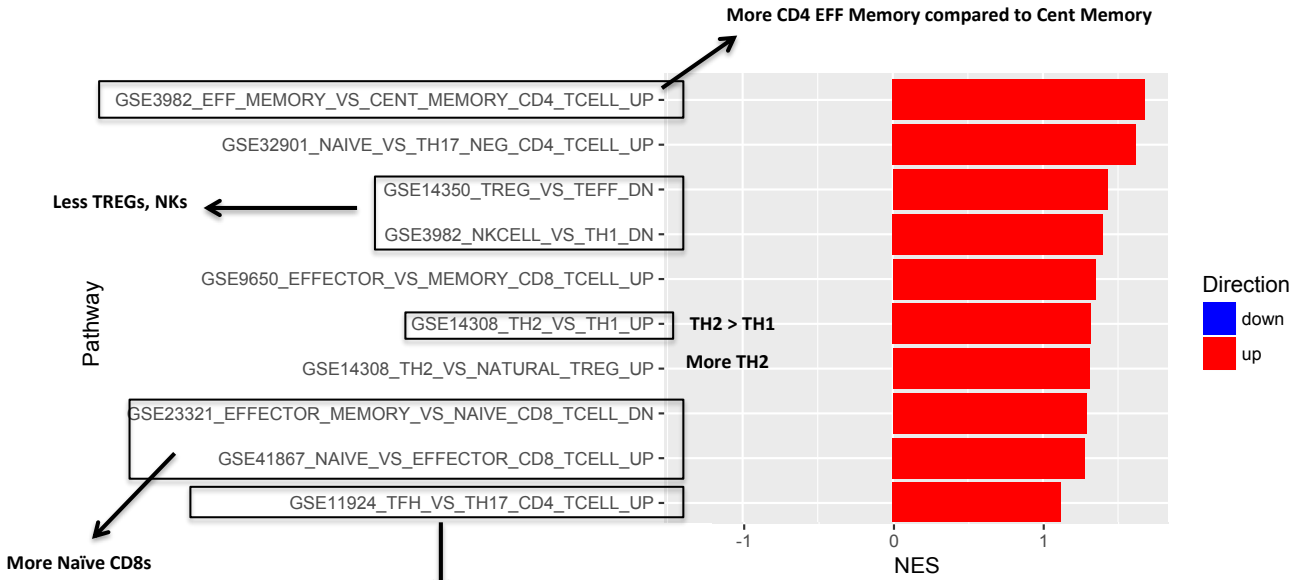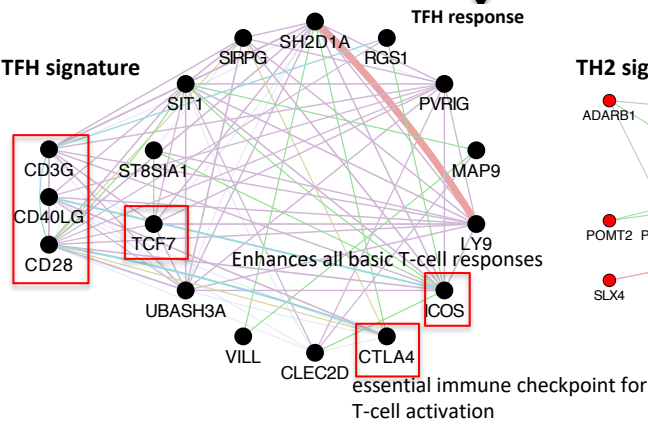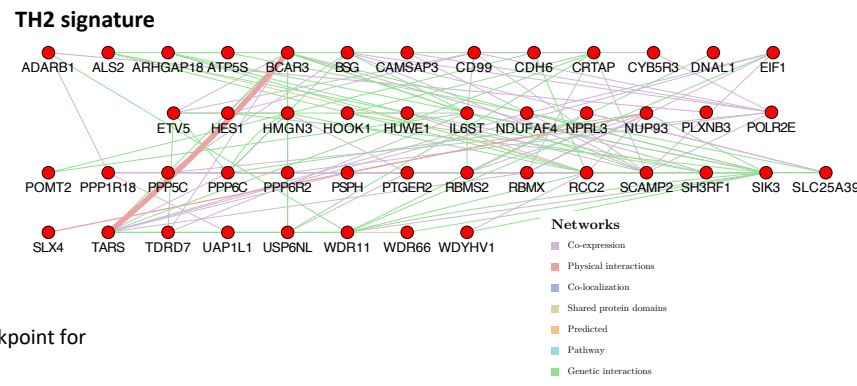

Supplement: NIHMS1623647-supplement-5.pdf [file NIHMS1623647-supplement-5.pdf]
